# Supplementary material for: Assembly of a high-scattering photoelectrode using a hybrid nano-TiO2 paste
Source: Royal Society of Chemistry journal article supplement (doi:10.1039/c5tc00860c), 2015-01-01
Supplement: c5tc00860c1.pdf [file c5tc00860c1.pdf]

## Supporting Information

### **Assembling of a high-scattering photoelectrode using a hybrid nano-TiO<sub>2</sub> paste**

Jia Lin,<sup>a</sup> Li Zheng,<sup>a</sup> Xiaolin Liu,<sup>b</sup> Shu Zhu,<sup>b</sup> Yongsheng Liu<sup>a</sup> and Xianfeng Chen<sup>\*b</sup>

<sup>a</sup> Department of Physics, Shanghai University of Electric Power, 2103 Pingliang Road, Shanghai 200090, China

<sup>b</sup> Department of Physics and Astronomy, Shanghai Jiao Tong University, 800 Dongchuan Road, Shanghai 200240, China

\*Corresponding author: [xfchen@sjtu.edu.cn](mailto:xfchen@sjtu.edu.cn)

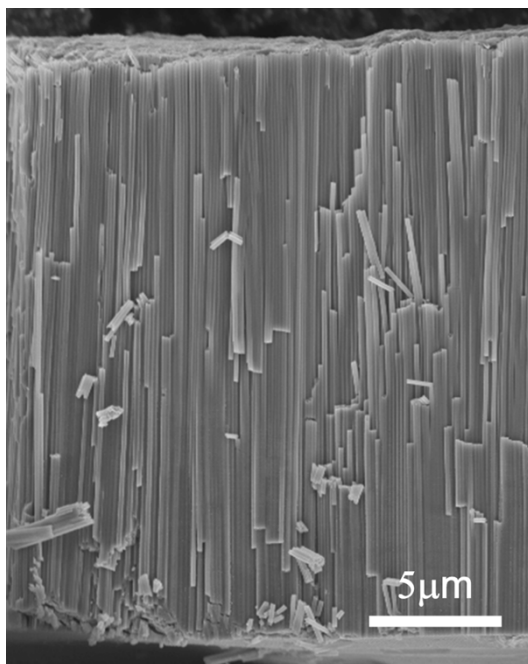

**Fig. S1** The cross-sectional SEM image of the original NT layer before ultrasonic dispersion.

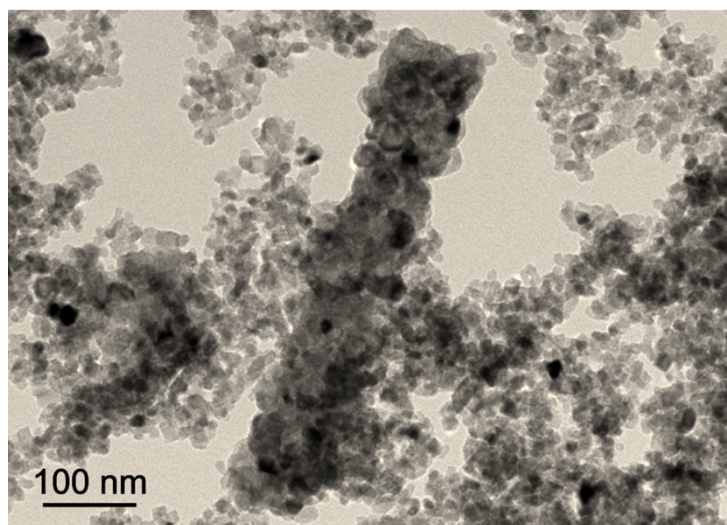

**Fig. S2** The typical TEM image of the NT-NP hybrid structure.

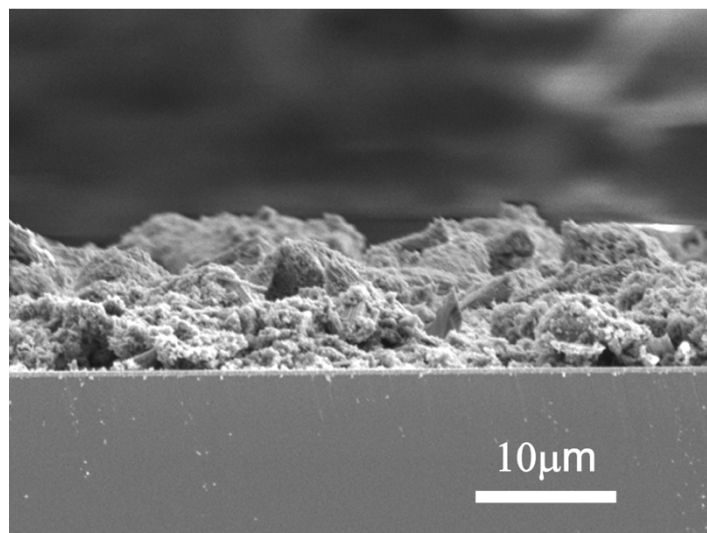

**Fig. S3** The cross-sectional SEM image of 100%-NT sample annealed at 650 °C.

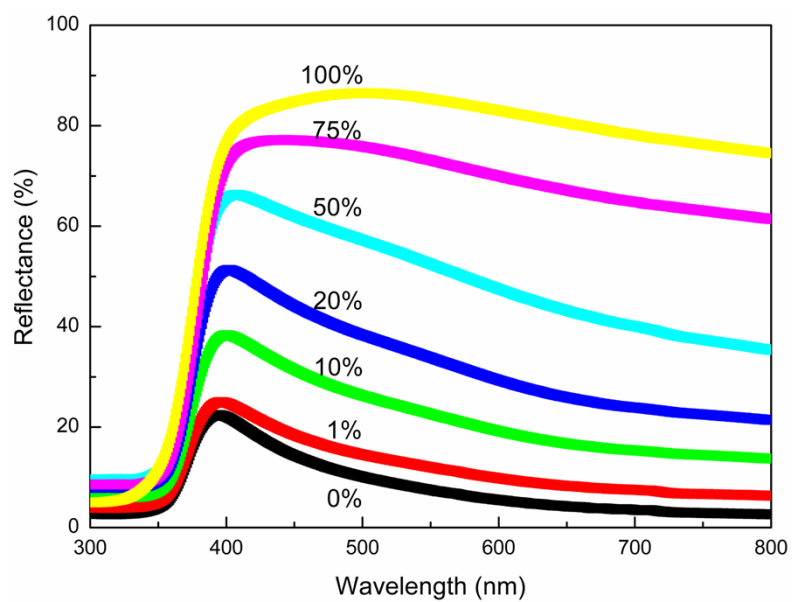

**Fig. S4** The diffuse reflectance spectra of the NT-NP hybrid photoanodes.
